# Supplementary material for: Changes in Bull Semen Metabolome in Relation to Cryopreservation and Fertility
Source: MDPI journal article supplement (doi:10.3390/ani10061065), 2020-06-19
Supplement: s1 [file s1]

# Supplementary: Changes in Bull Semen Metabolome in Relation to Cryopreservation and Fertility

Valentina Longobardi <sup>1</sup>, Michal A. Kosior <sup>2</sup>, Nunzia Pagano <sup>2</sup>, Gerardo Fatone <sup>2,\*</sup>, Alessia Staropoli <sup>3</sup>, Anastasia Vassetti <sup>3</sup>, Francesco Vinale <sup>2,3</sup>, Giuseppe Campanile <sup>2</sup> and Bianca Gasparrini <sup>2</sup>

<sup>1</sup> Department of Precision Medicine, University of Campania Luigi Vanvitelli, Naples, 80138, Italy; ; longobardivalentina@gmail.com (V.L.);

<sup>2</sup> Department of Veterinary Medicine and Animal Production, Federico II University of Naples, 80137 Naples, Italy; m.kosior@hotmail.com (M.A.K.); nunzia91n@libero.it (N.P.); francesco.vinale@ipsp.cnr.it (F.V.); giucampa@unina.it (G.C.); bgasparr@unina.it (B.G.)

<sup>3</sup> CNR Institute for Sustainable Plant Protection, 80055 Portici, Italy; al.staropoli@gmail.com (A.S.); an.vassetti@libero.it (A.V.)

\* Correspondence: gerardo.fatone@unina.it

Received: 1 June 2020; Accepted: 17 June 2020; Published: date

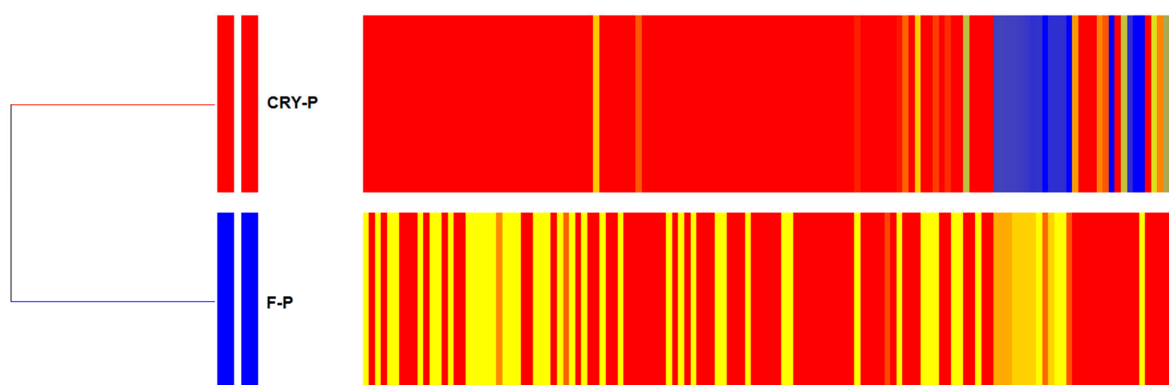

**Figure S1.** Hierarchical clustering analysis of fresh (in blue; F-P) and cryopreserved (in red; CRY-P) seminal plasma. Differentially expressed metabolites were obtained from T-test  $p\text{-value} < 0.05$  and fold change  $> 2.0$ .

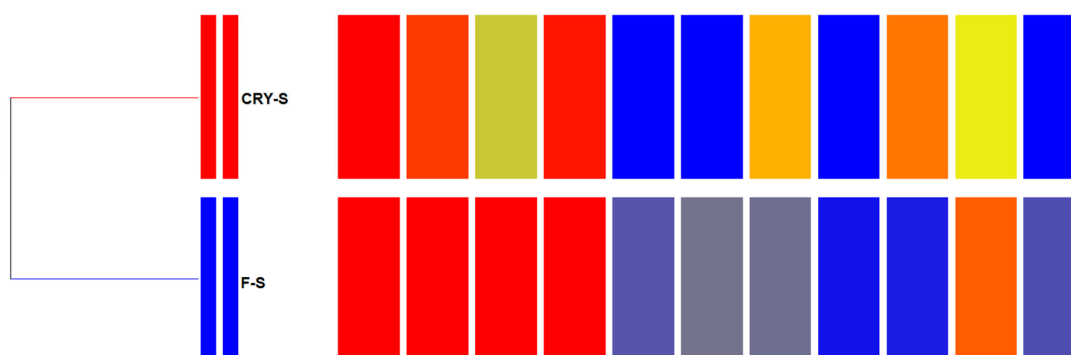

**Figure S2.** Hierarchical clustering analysis of fresh (blue; F-S) and cryopreserved (red; CRY-S) spermatozoa. Differentially expressed metabolites were obtained from T-test  $p\text{-value} < 0.05$  and fold change  $> 2.0$ .

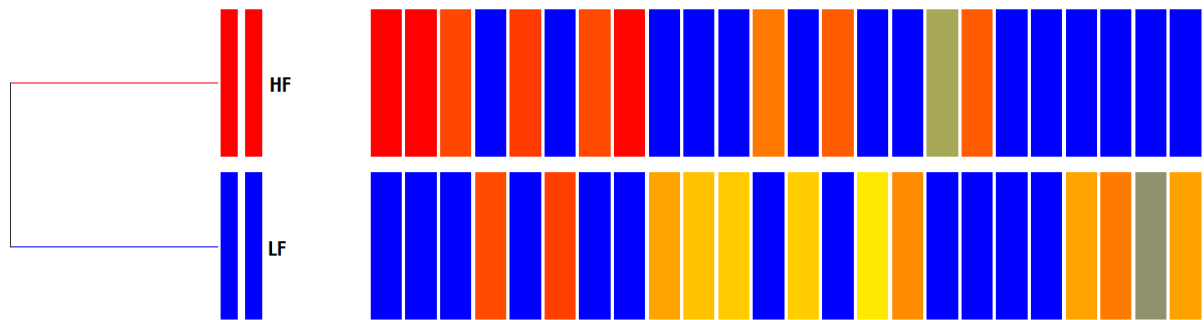

**Figure S3.** Hierarchical clustering analysis of fresh seminal plasma for high (in red; HF) and low (in blue; LF) fertility bulls. Differentially expressed metabolites were obtained from T-test  $p\text{-value} < 0.05$  and fold change  $> 2.0$ .

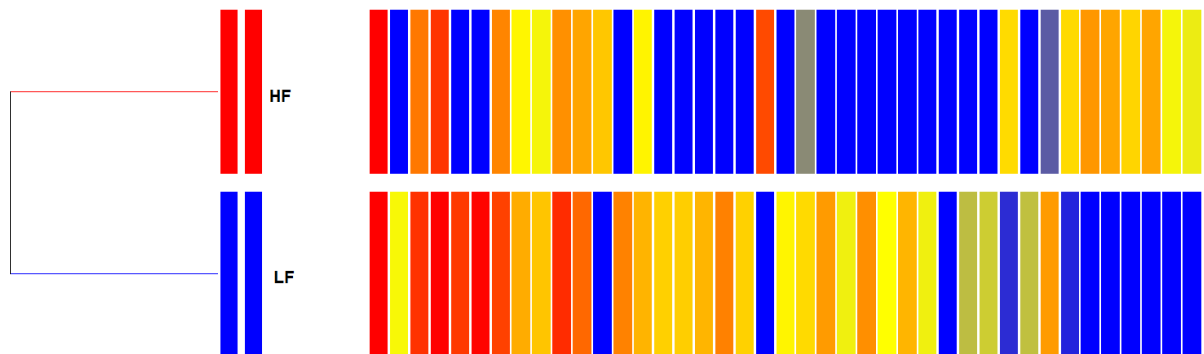

**Figure S4.** Hierarchical clustering analysis of cryopreserved seminal plasma for high (in red; HF) and low (in blue; LF) fertility bulls. Differentially expressed metabolites were obtained from T-test  $p\text{-value} < 0.05$  and fold change  $> 2.0$ .

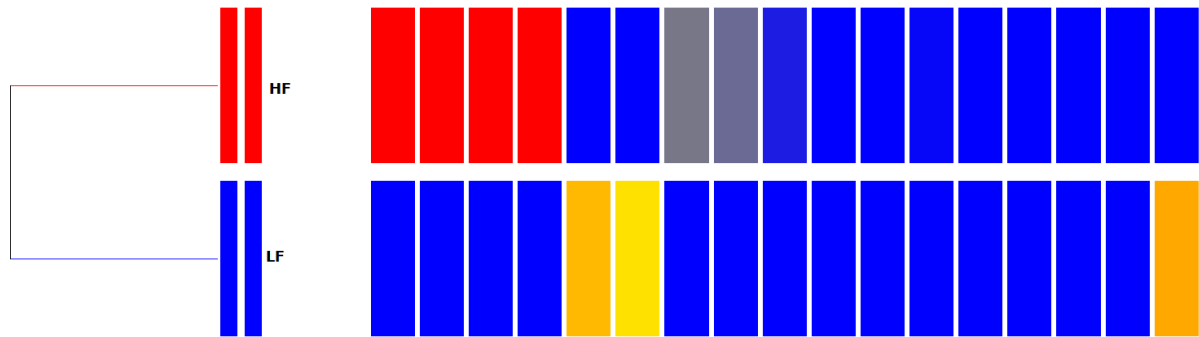

**Figure S5.** Hierarchical clustering analysis of fresh spermatozoa for high (in red; HF) and low (in blue; LF) fertility bulls. Differentially expressed metabolites were obtained from T-test  $p\text{-value}<0.05$  and fold change $>2.0$ .

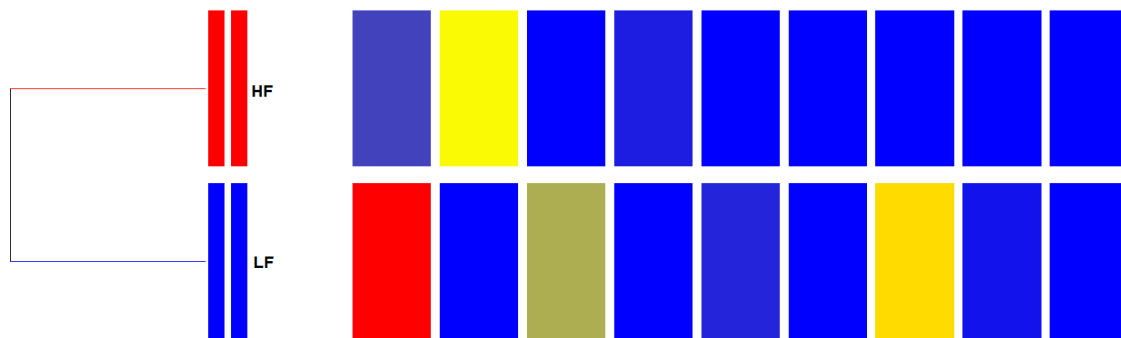

**Figure S6.** Hierarchical clustering analysis of cryopreserved spermatozoa for high (in red; HF) and low (in blue; LF) fertility bulls. Differentially expressed metabolites were obtained from T-test  $p\text{-value}<0.05$  and fold change $>2.0$ .
